# Supplementary material
Source: PubMed Central journal article supplement (PMC5650234)
Supplement: NIHMS904801-supplement-Rimm_Supplemental.pdf [file NIHMS904801-supplement-Rimm_Supplemental.pdf]

Supplemental Material:

Table 1: Description of the cohort from which tissues\* were selected

| <b>Characteristic</b>    | <b>Number of Patients</b> | <b>Percentage of Patients</b> |
|--------------------------|---------------------------|-------------------------------|
| <b>All Patients</b>      | 90                        | 100%                          |
| <b>Age at Diagnosis</b>  |                           |                               |
| <70                      | 33                        | 37%                           |
| ≥70                      | 57                        | 63%                           |
| <b>Sex</b>               |                           |                               |
| Male                     | 42                        | 47%                           |
| Female                   | 48                        | 53%                           |
| <b>Histotype**</b>       |                           |                               |
| Adenocarcinoma           | 45                        | 50%                           |
| Squamous cell            | 45                        | 50%                           |
| <b>Stage</b>             |                           |                               |
| I                        | 29                        | 32%                           |
| II                       | 31                        | 34%                           |
| III-IV                   | 13                        | 14%                           |
| N/A                      | 17                        | 19%                           |
| <b>Tumor size, cm</b>    |                           |                               |
| <2                       | 12                        | 13%                           |
| 2-5                      | 62                        | 69%                           |
| >5                       | 5                         | 6%                            |
| N/A                      | 11                        | 12%                           |
| <b>Lymph node status</b> |                           |                               |
| Negative                 | 59                        | 66%                           |
| Positive                 | 21                        | 23%                           |
| N/A                      | 10                        | 11%                           |

\*All tissues used in the study were from resection specimens. No biopsy tissue or FNA material was used.

\*\*No systematic differences were assessed between squamous and adenocarcinoma in this study

Table 2: Comparison of SP142 protocol done for this study (XT(Mayo)) vs the current FDA approved protocol (Ultra/Ventana).

| Protocol Parameter               | Ultra (Ventana)                  | XT (Mayo)                        |
|----------------------------------|----------------------------------|----------------------------------|
| Deparaffinization                | Selected                         | Selected                         |
| Cell Conditioning                | CC1 Cell Conditioning 48 minutes | CC1 Cell Conditioning 64 minutes |
| Pre- primary antibody peroxidase | Selected                         | Selected                         |
| Primary Antibody                 | VENTANA PD L1 (SP142)            | Spring PD-L1 Clone SP142         |
| OptiView HQ Linker               | 8 minutes (default)              | 8 minutes (default)              |
| OptiView Amplification           | 8 minutes (default)              | 8 minutes (default)              |
| Amplifier and Amplification      | Selected                         | Selected                         |
| Amplifier and Amplification H2O2 | 8 minutes                        | 4 min                            |
| Amplification Multimer           | 8 minutes                        | 4 min                            |
| Counterstain                     | Hematoxylin II, 4 minutes        | Hematoxylin II, 8 minutes        |
| Post Counterstain                | Bluing Reagent, 4 minutes        | Bluing Reagent, 4 minutes        |

Table 3: The protocol for the LDT assay for PD-L1 using E1L3N on the Leica Bond platform

**Immunohistochemistry protocol for PD-L1 E1L3N staining:**

Staining was performed on the Bond RX automated staining platform. Slides were processed in 4 batches, at each staining run the PD-L1 specific index tissue microarray (TMA) YTMA 337 was included for quality control and reproducibility purposes. Slides were baked at 60 degree Celsius for 20 minutes on the automated staining platform, then deparaffinized using the Leica Bond Dewax solution and rehydrated with Alcohol and Bond Wash Solution according to the Bond “Bake and Dewax” protocol. Antigen retrieval was performed using the Leica Bond Epitope Retrieval 2 (pH 9) for 20 minutes at 97 degree Celsius, followed by incubation with the Bond Peroxide Block for 5 minutes. Slides were then incubated with the primary PD-L1 rabbit monoclonal antibody from Cell Signaling Technology, clone E1L3N (CST #13684), at a concentration of 3.3 ug/ml, followed by signal amplification and visualization using the Leica Bond Polymer Refine Detection Kit (catalogue number: DS9800). Operating parameters for application of the detection system reagents were followed as suggested and incorporated into the software by Leica Biosystems. Finally slides were dehydrated and cover-slipped.

Table 4: The unified scoring system\* for PD-L1

For Tumor Cells

| Category | Range          | Drugs Justifying Category Cut-point |
|----------|----------------|-------------------------------------|
| A        | Negative or 0% | All drugs                           |
| B        | 1% to 4%       | Nivolumab and Pembrolizumab         |
| C        | 5% to 9%       | Nivolumab and Atezolizumab          |
| D        | 10% to 24%     | Nivolumab                           |
| E        | 25% to 49%     | Durvalumab                          |
| F        | 50% or more    | Pembrolizumab and Atezolizumab      |

For Immune Cells

| Category | Range          | Drugs Justifying Category Cut-point |
|----------|----------------|-------------------------------------|
| A        | Negative or 0% | All drugs                           |
| B        | 1% to 9%       | Atezolizumab (IC1 and IC2)          |
| C        | 10% or more    | Avelumab and Atezolizumab           |

\*Note that this system is designed to include all cut-points included in any current assay for the 4 drugs in trials at the time of the study design. The system was designed to categorize the percentages for optimal statistical comparison.

Table 5: Intraclass Correlation Coefficient (ICC) for the Antibodies and Platforms

| ICC for Tumor (4 antibodies) | ICC for Tumor (3 antibodies) | ICC for Immune Cells (4 antibodies) | ICC for Immune Cells (3 antibodies) |
|------------------------------|------------------------------|-------------------------------------|-------------------------------------|
| 0.813                        | 0.971                        | 0.277                               | 0.804                               |
